# Supplementary material for: Patient-related prognostic factors for function and pain after shoulder arthroplasty: a systematic review
Source: PubMed Central journal article supplement (PMC11583791; doi:10.1186/s13643-024-02694-y), 2024-11-22

## Appendix 2 – Supplementary figures

Figure A1 – Meta-analysis for ‘Age’ on ‘ASES raw scores’, medium-long term (sensitivity analysis)

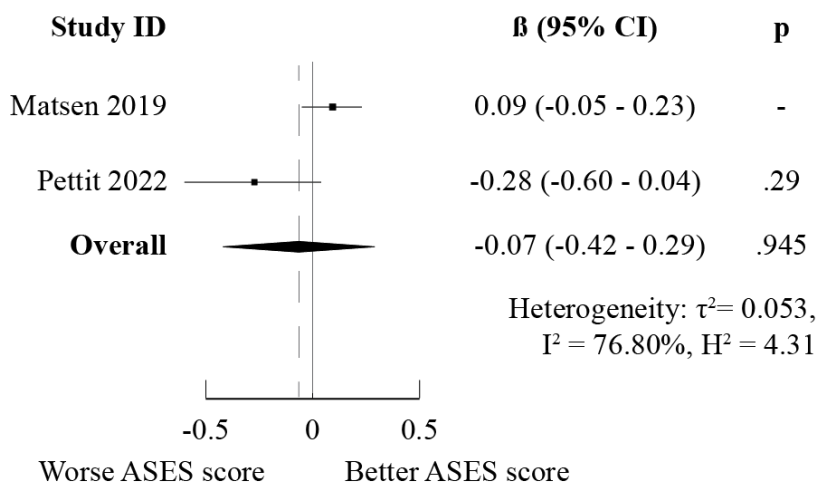

Figure A2 – Meta-analysis for ‘Previous surgery’ on ‘Poor ASES score’, medium-long term (sensitivity analysis)

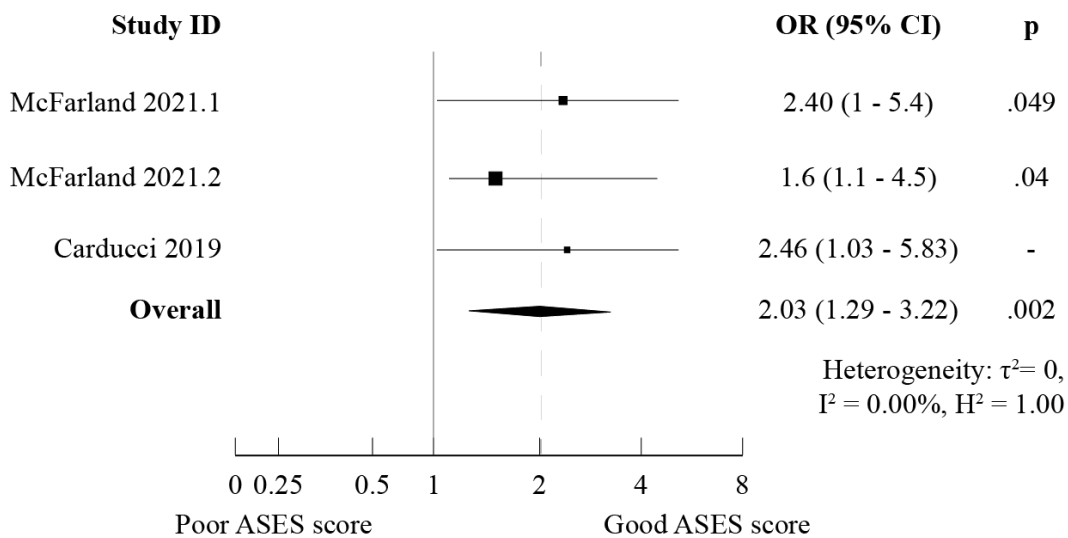

Figure A3 – Summary of Findings figure for Functional Recovery, short term

**Short term - Functional recovery**

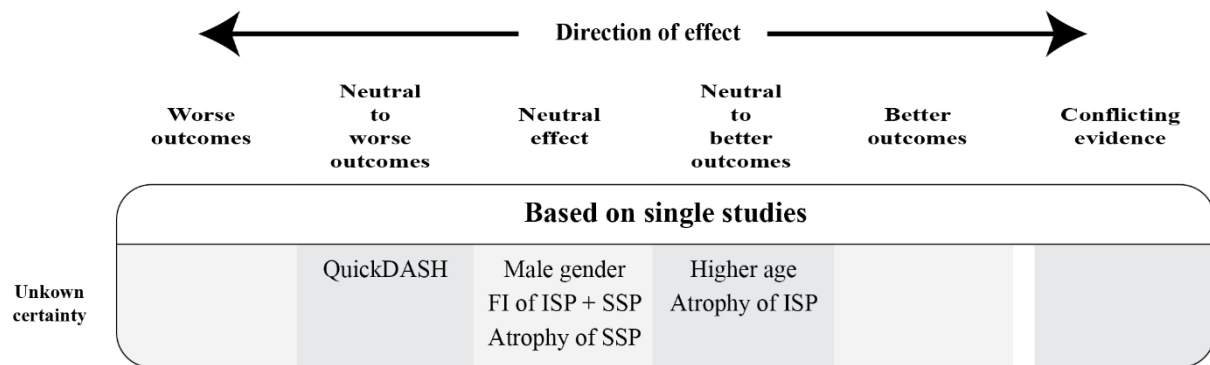

Figure A4 – Summary of Findings figure for Functional Recovery & Pain, medium-long term

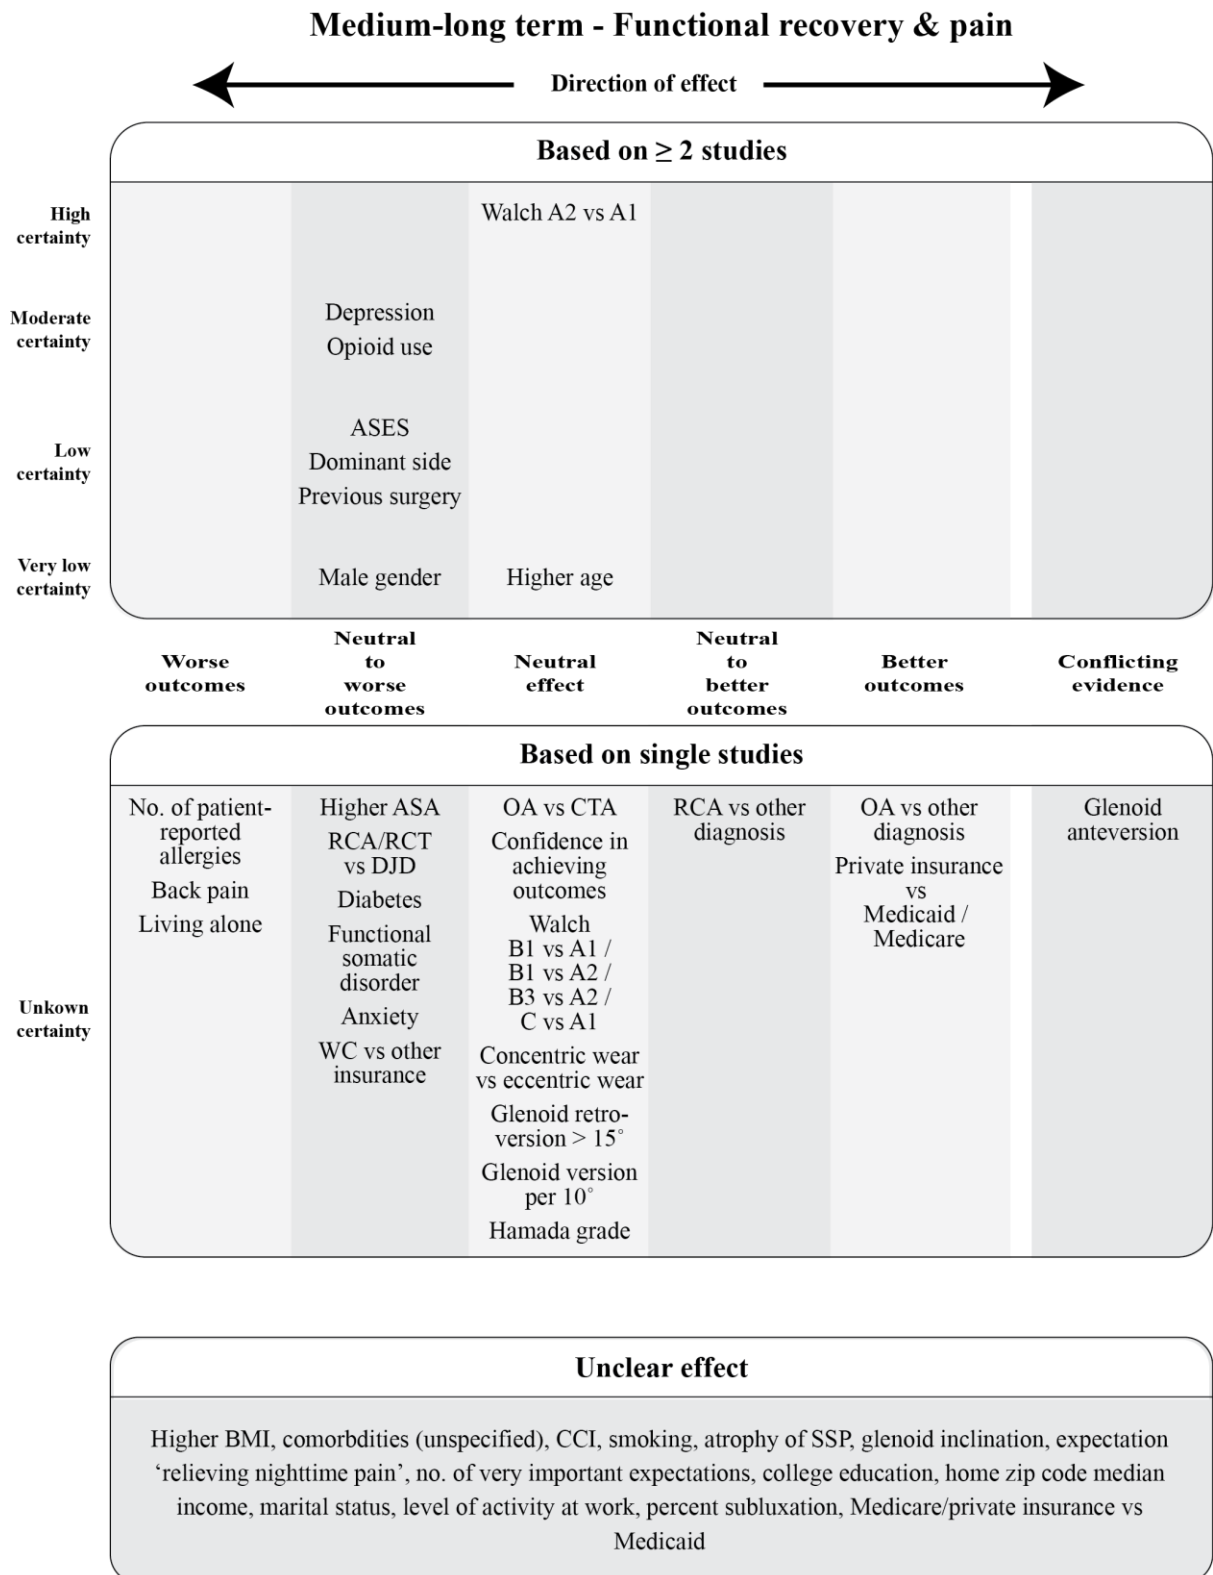

Figure A5 – Summary of Findings figure for Functional Recovery, medium-long term

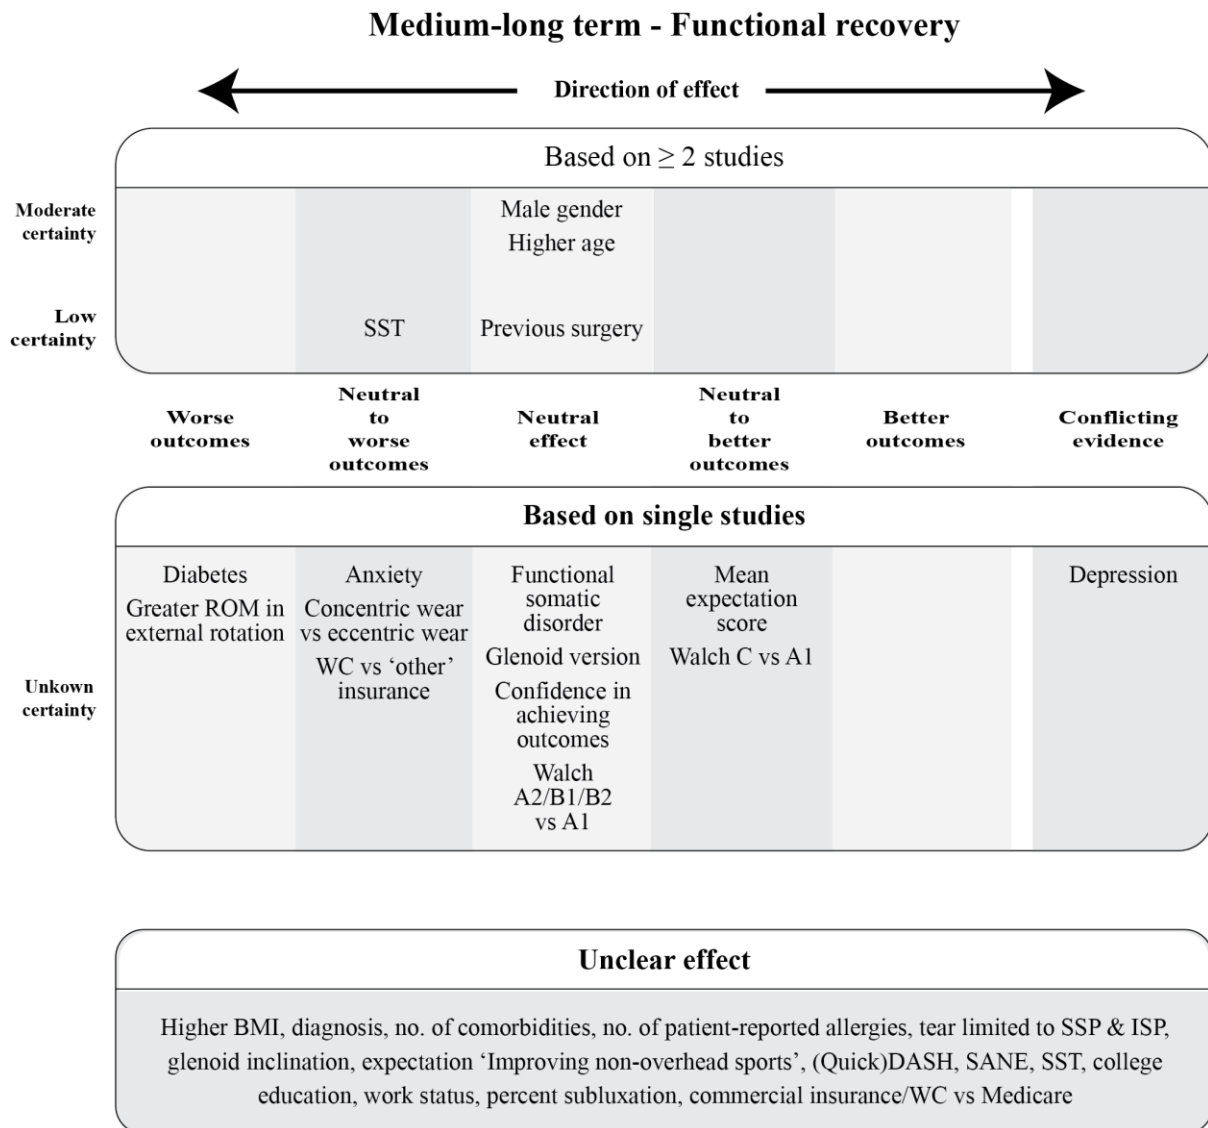

Figure A6 – Summary of Findings figure for Pain, medium-long term

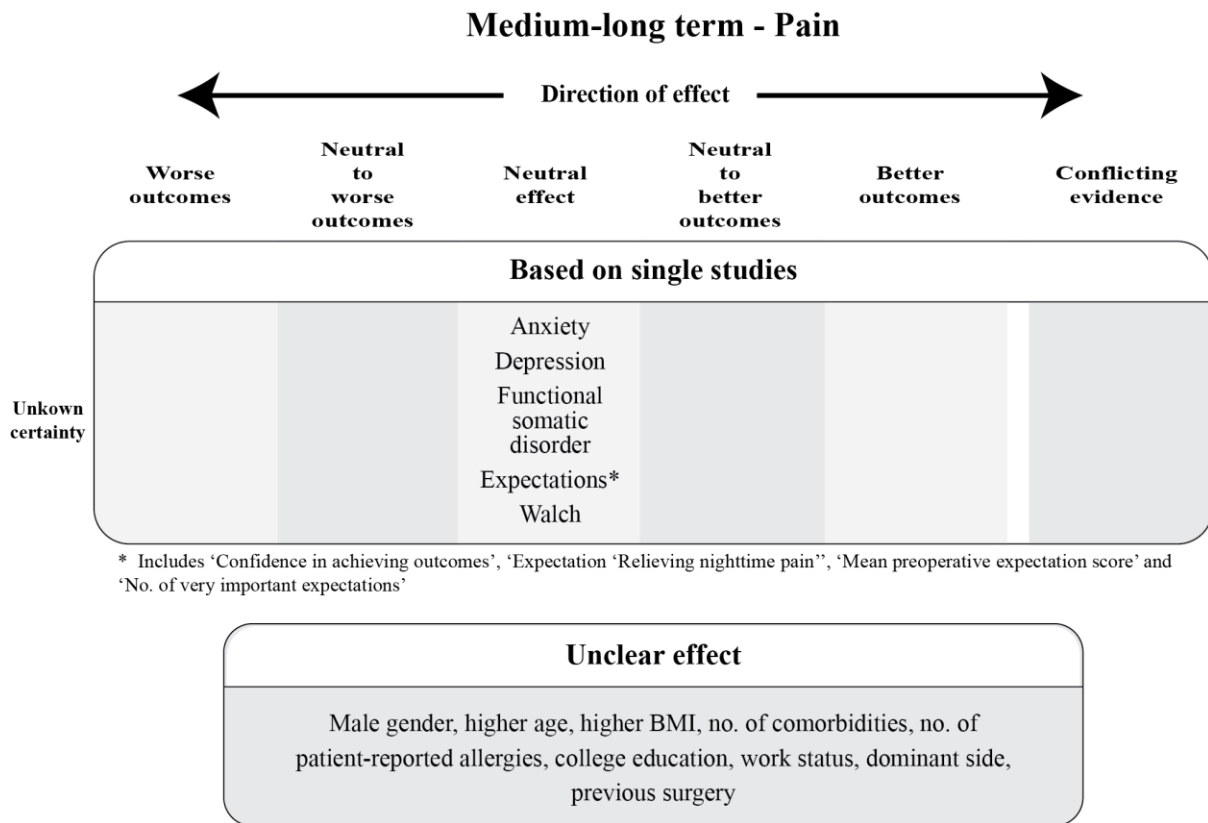

Figure A7 – Summary of Findings figure for Functional Recovery & Pain, long term

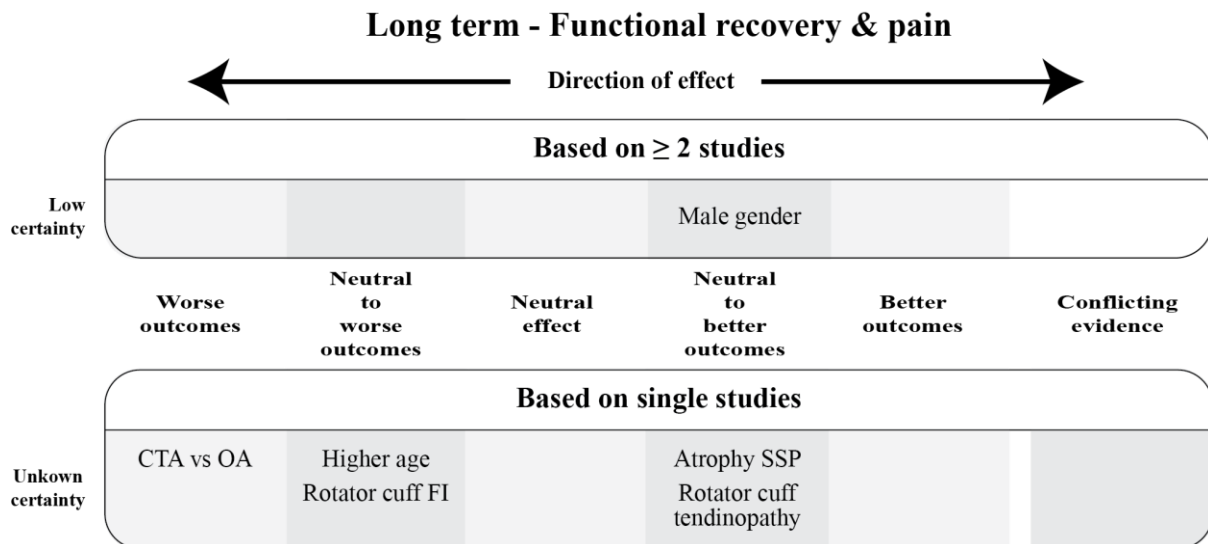

Figure A8 – Summary of Findings figure for Functional Recovery, long term

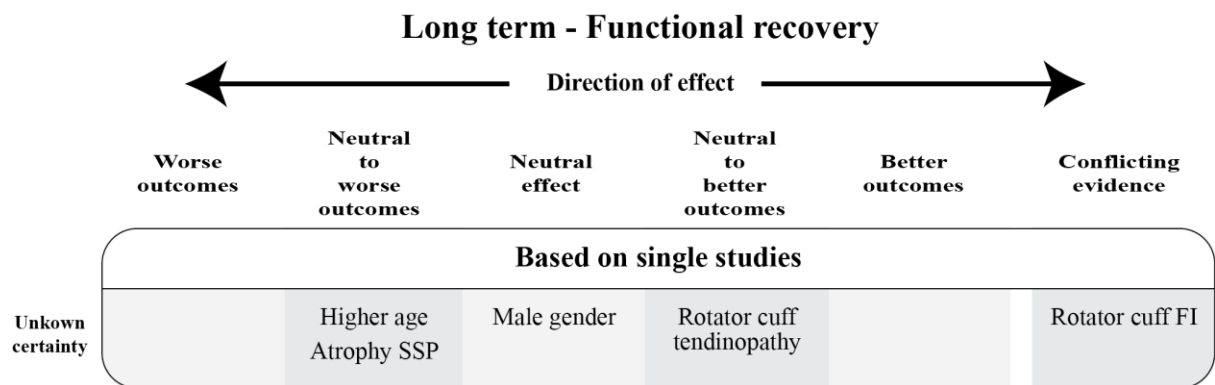

Supplement: 13643_2024_2694_MOESM2_ESM.pdf [file 13643_2024_2694_MOESM2_ESM.pdf]
